# Supplementary material for: Drivers of atmospheric methane uptake by montane forest soils in the southern Peruvian Andes
Source: Copernicus journal article supplement (doi:10.5194/bg-2016-16), 2016-01-27
Supplement: Supplementary file 1 [file bg-2016-16-supplement.pdf]

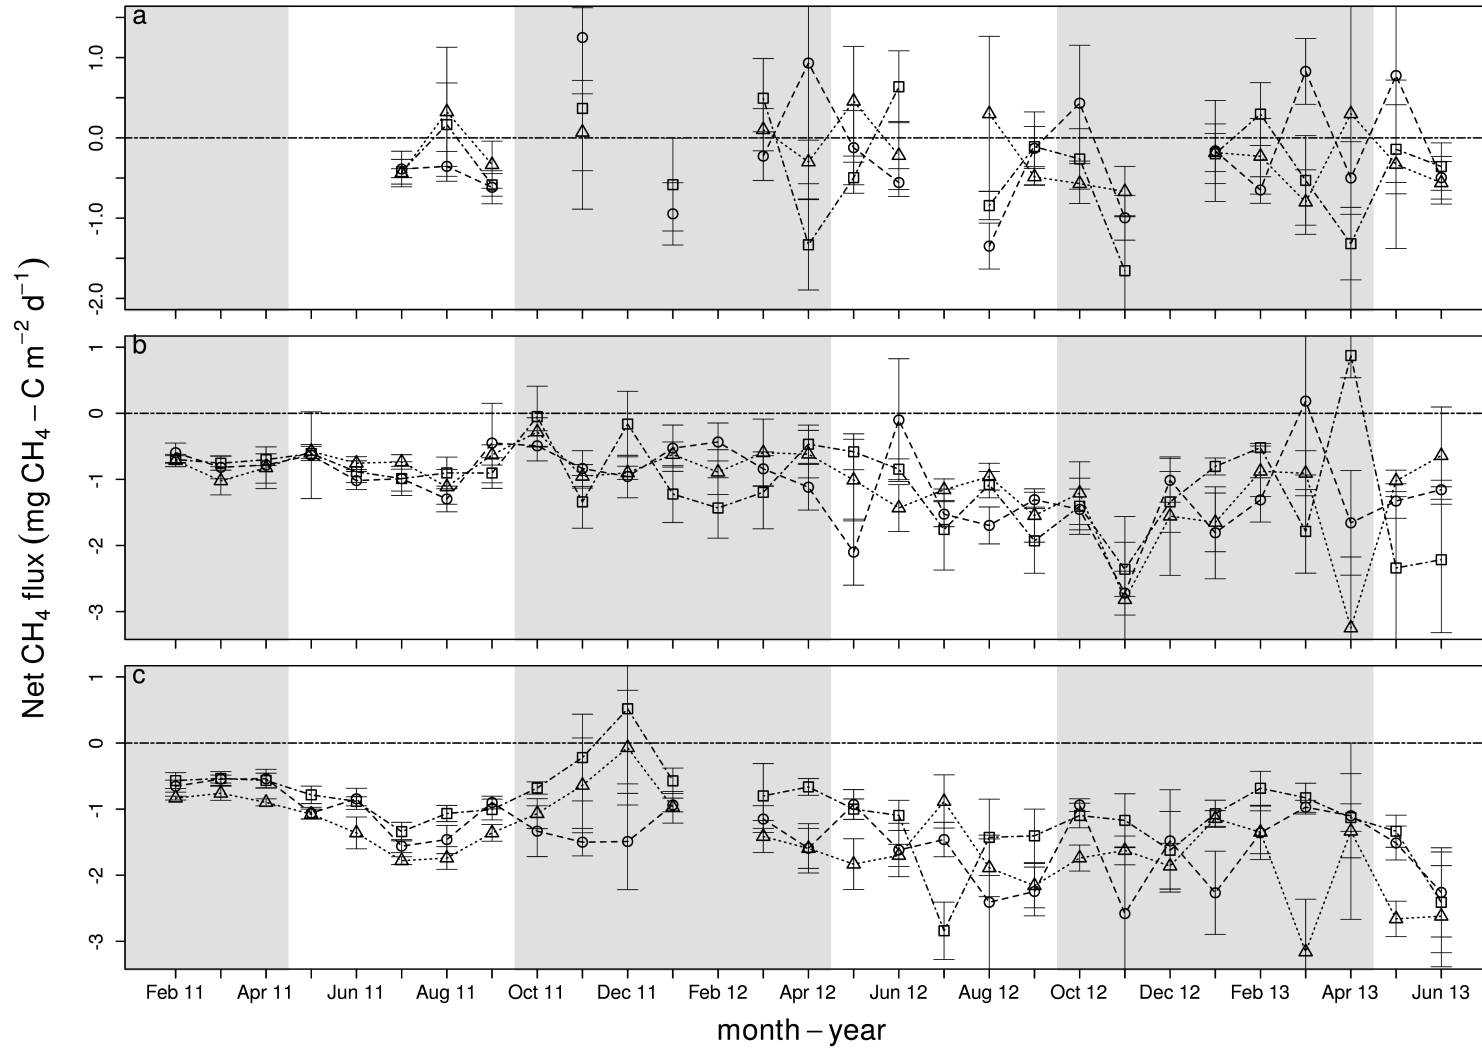

Figure S1: Monthly plot means and standard error of net CH<sub>4</sub> flux at a) Hacienda Villa Carmen, premontane forest, b) San Pedro, lower montane forest and c) Wayqecha, upper montane forest. Shading indicates the wet season of October – April.

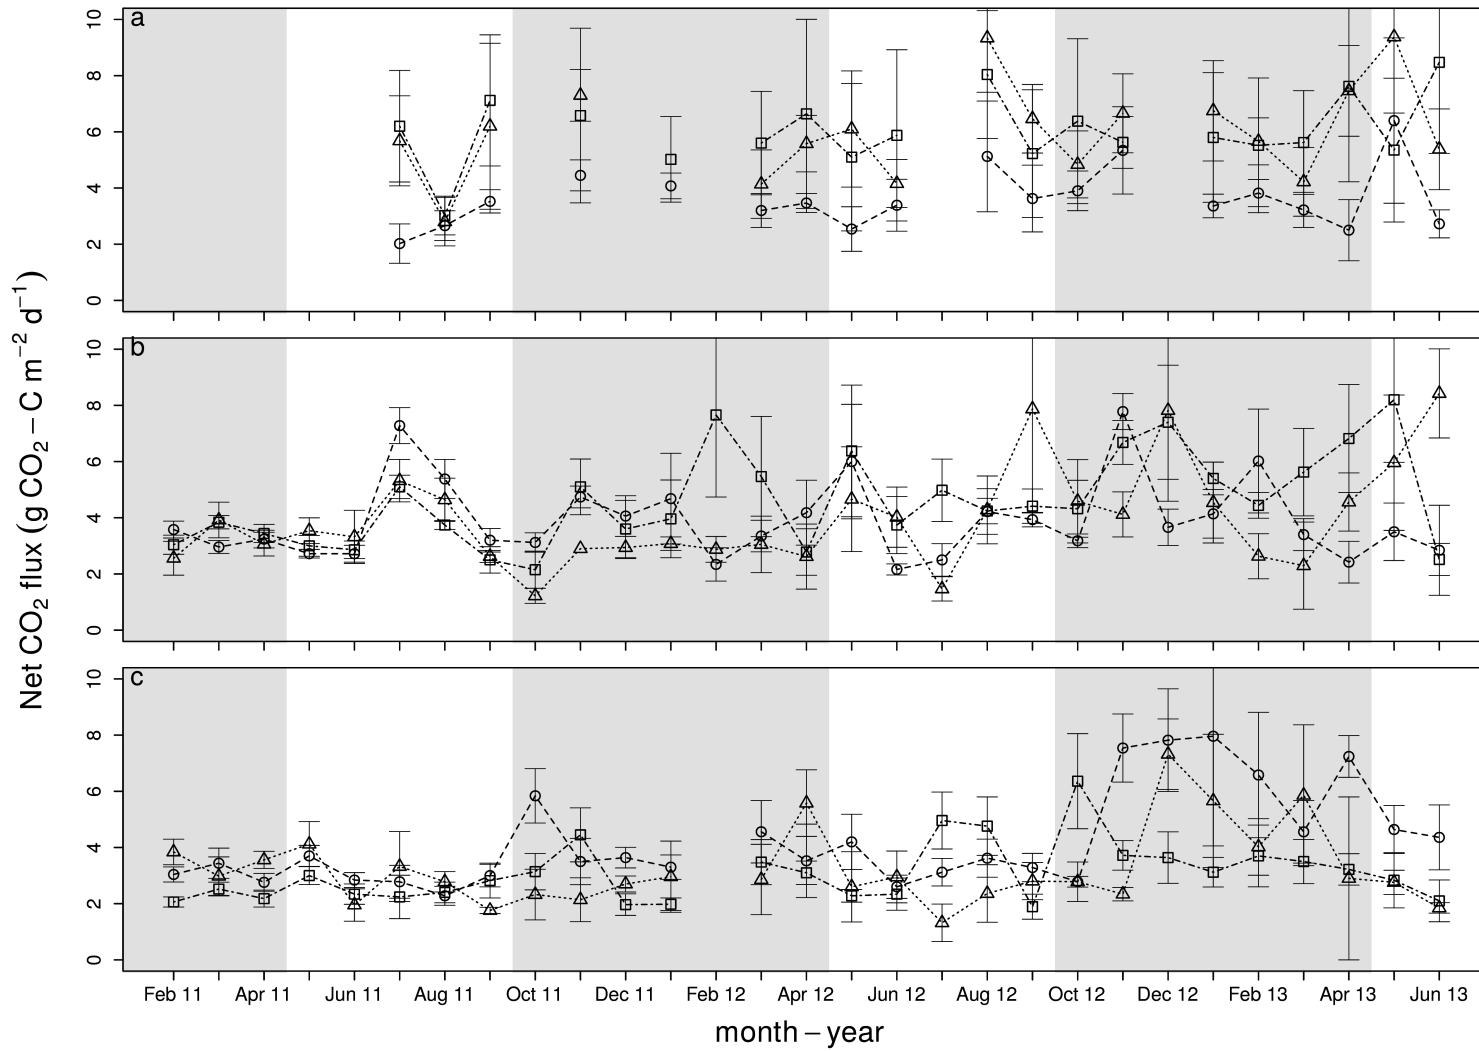

Figure S2: Monthly plot means and standard error of net CO<sub>2</sub> flux at a) Hacienda Villa Carmen, premontane forest, b) San Pedro, lower montane forest and c) Wayqecha, upper montane forest. Shading indicates the wet season of October – April.

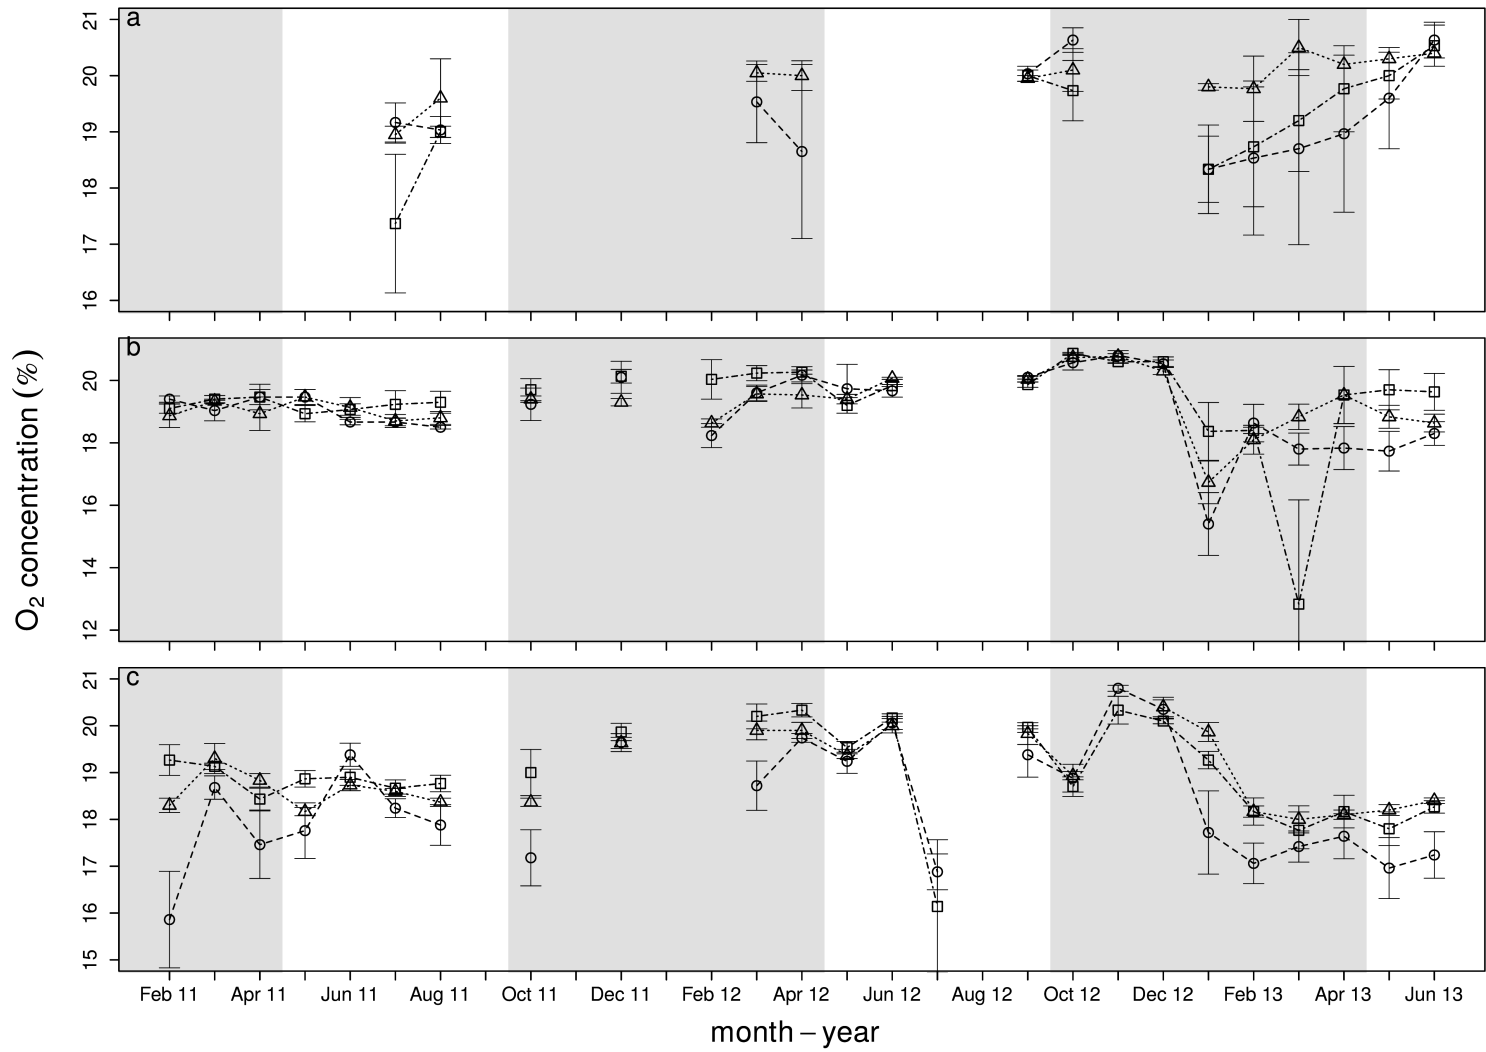

Figure S3: Monthly plot means and standard error of soil O<sub>2</sub> concentration at a) Hacienda Villa Carmen, premontane forest, b) San Pedro, lower montane forest and c) Wayqecha, upper montane forest. Shading indicates the wet season of October – April.

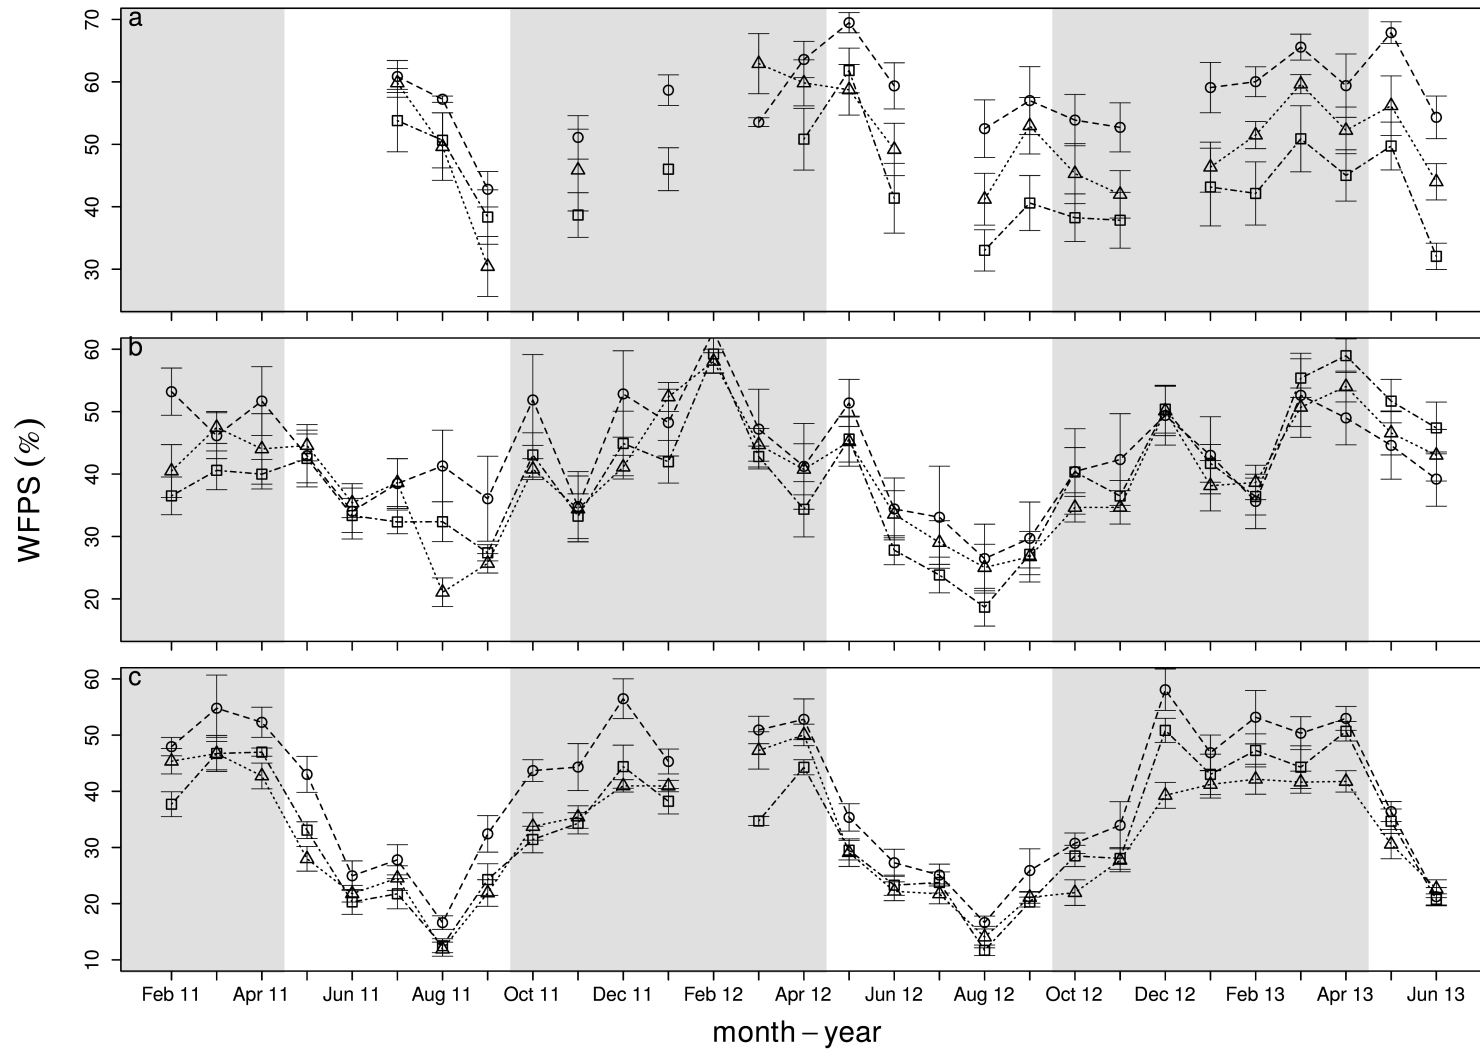

Figure S4: Monthly plot means and standard error of WFPS at a) Hacienda Villa Carmen, premontane forest, b) San Pedro, lower montane forest and c) Wayqecha, upper montane forest. Shading indicates the wet season of October – April.

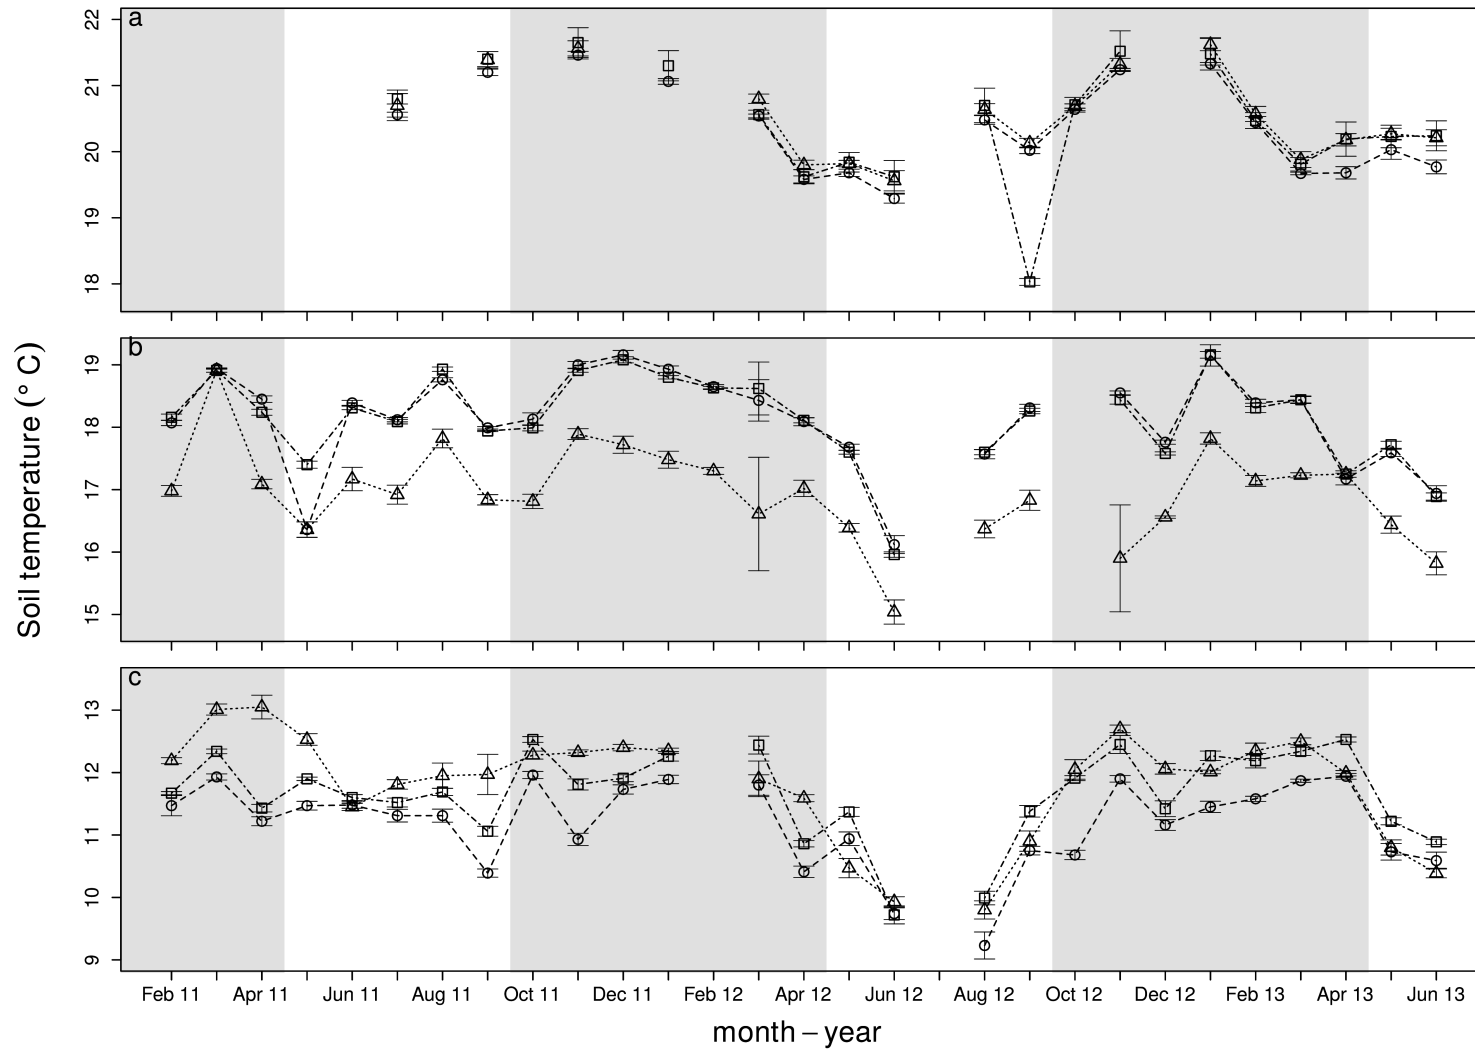

Figure S5: Monthly plot means and standard error of soil temperature at a) Hacienda Villa Carmen, premontane forest, b) San Pedro, lower montane forest and c) Wayqecha, upper montane forest. Shading indicates the wet season of October – April.

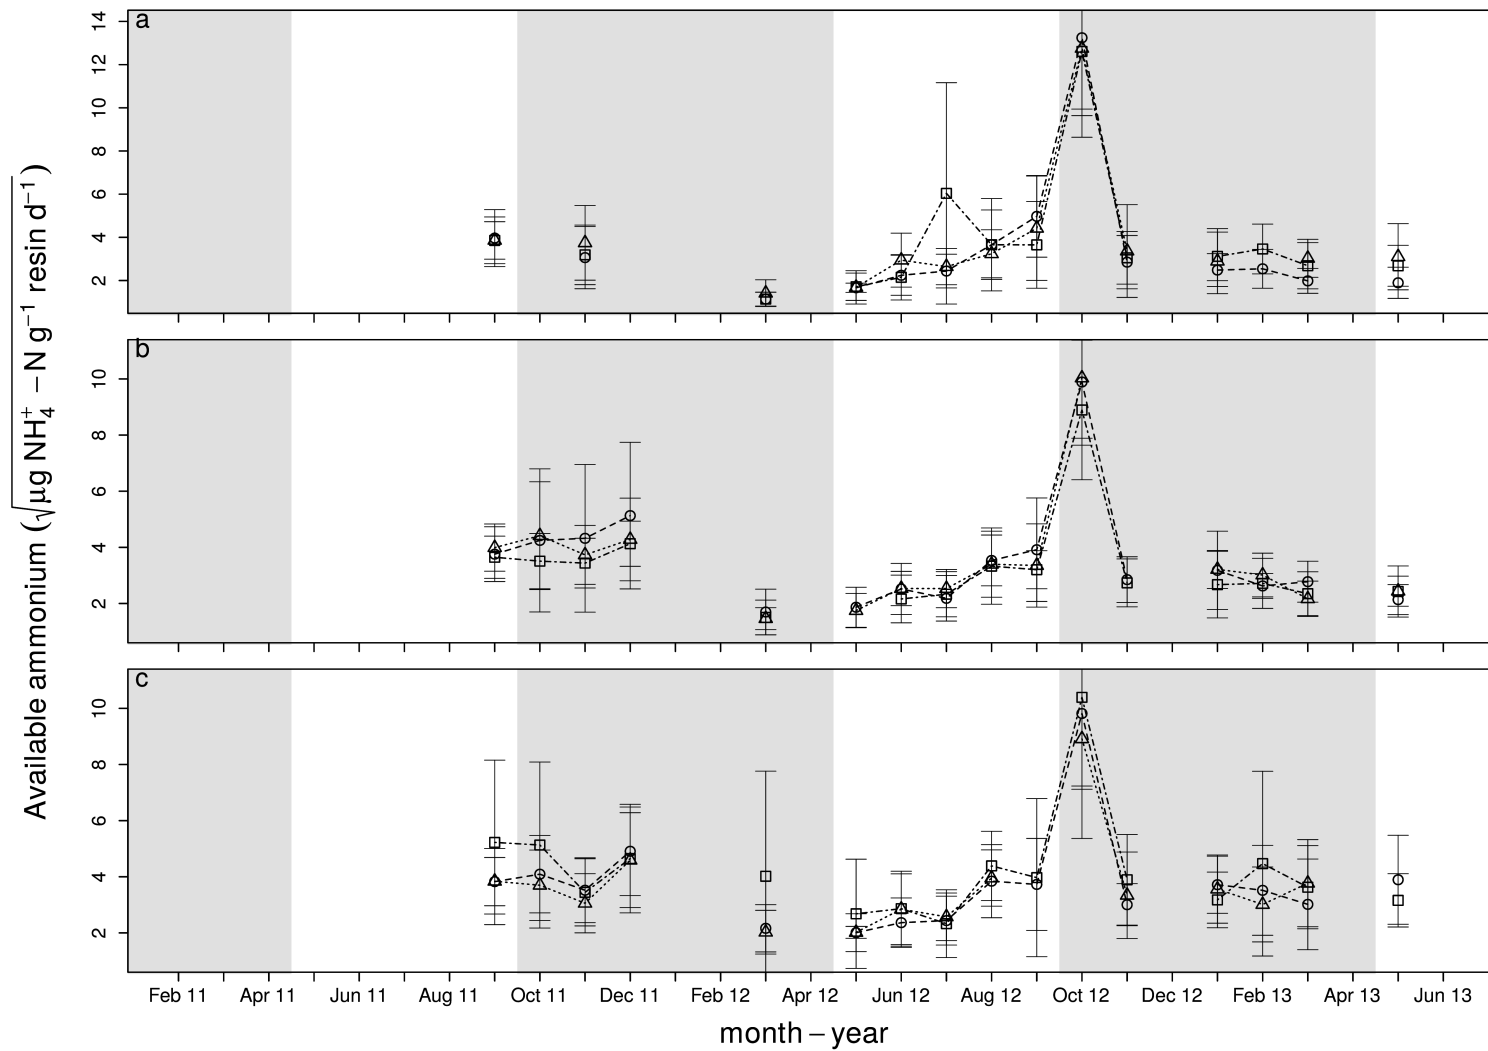

Figure S6: Monthly plot means and standard error of square root transformed available ammonium at a) Hacienda Villa Carmen, premontane forest, b) San Pedro, lower montane forest and c) Wayqecha, upper montane forest. Shading indicates the wet season of October – April.

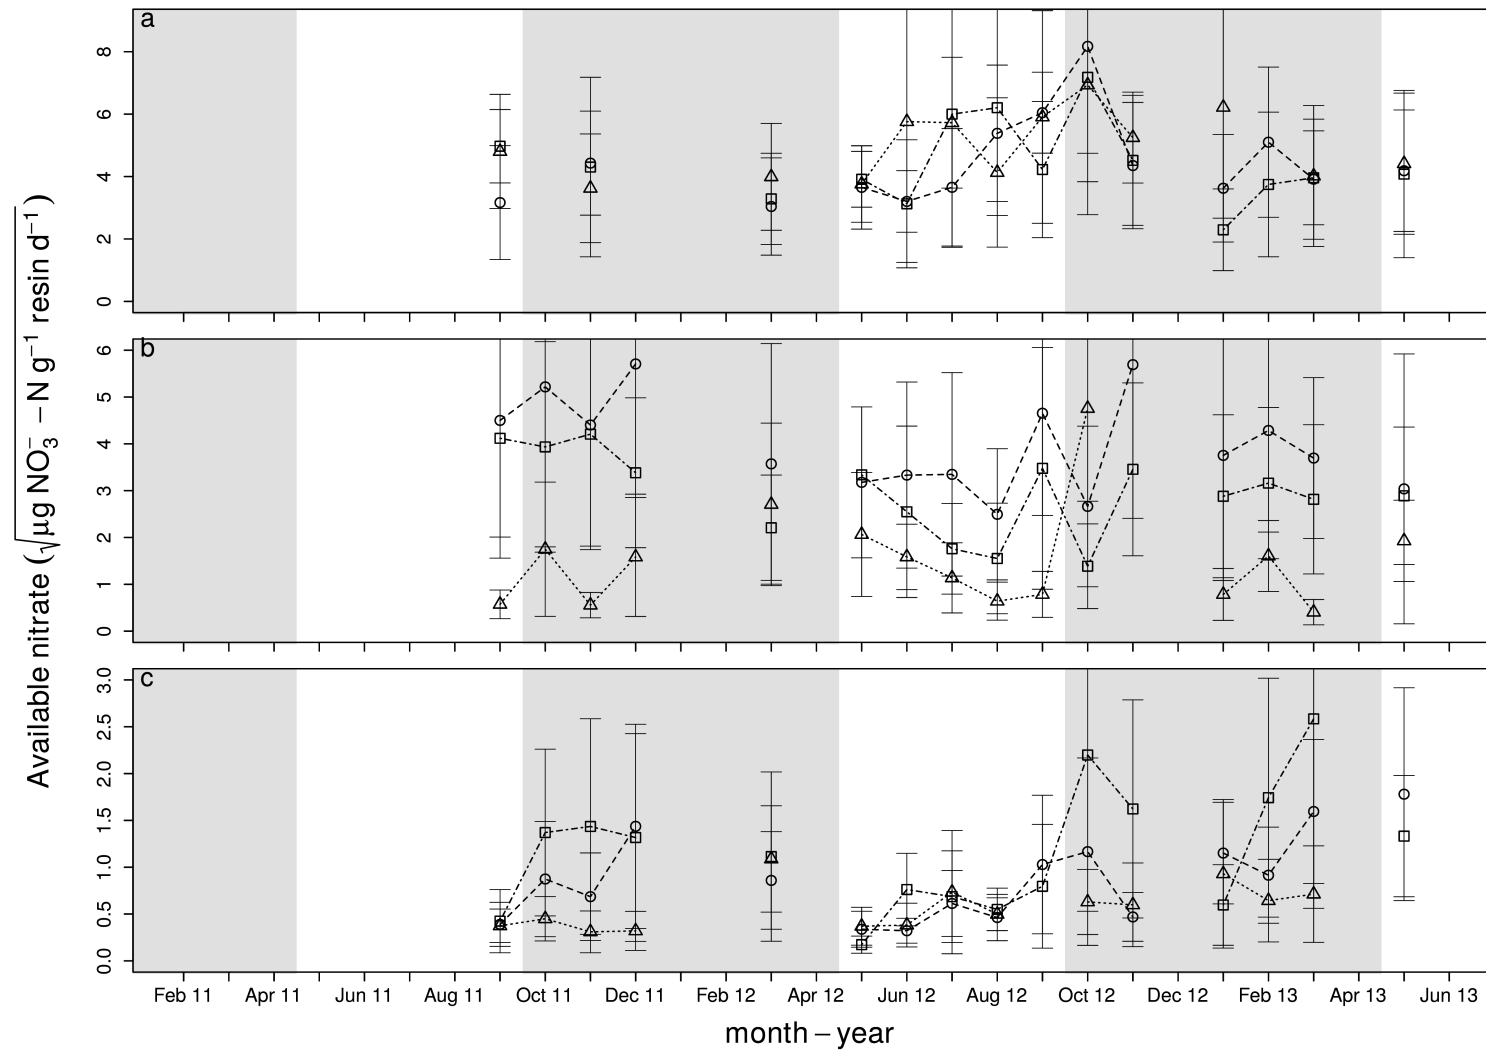

Figure S6: Monthly plot means and standard error of square root transformed available nitrate at a) Hacienda Villa Carmen, premontane forest, b) San Pedro, lower montane forest and c) Wayqecha, upper montane forest. Shading indicates the wet season of October – April.
